# Supplementary material for: Conjoint application of ultrasonication and redox pair mediated free radical method enhances the functional and bioactive properties of camel whey-quercetin conjugates
Source: PubMed Central journal article supplement — Ultrason Sonochem. 2021 Oct 8;79:105784. doi: 10.1016/j.ultsonch.2021.105784 (PMC8515292; doi:10.1016/j.ultsonch.2021.105784), 2021-10-08
Supplement: mmc1.pdf [file mmc1.pdf]

**Table S1. Wave number and area of different peaks present in the FTIR of camel whey-quercetin conjugates.**

|   | Whey    |                  | PR      |                  | PUS1    |                  | PUS2    |                  | PRUS1   |                  | PRUS2   |                  |
|---|---------|------------------|---------|------------------|---------|------------------|---------|------------------|---------|------------------|---------|------------------|
|   | area    | cm <sup>-1</sup> |
| * | 2535    | <b>3271.72</b>   | 3932.18 | 3266.95          | 5817.07 | 3268.41          | 3617.49 | 3267.12          | 5886.54 | 3266.1           | 5563.77 | 3266.97          |
| * | 1612.53 | <b>2899.96</b>   | 633.71  | 1658.71          | 461.18  | 1658.29          | 246.18  | 1660.67          | 464.83  | 1660.93          | 439.77  | 1661.59          |
| * | 743.23  | <b>1655.73</b>   | 296.13  | 1609.73          | 454.08  | 1609.08          | 242.44  | 1609.02          | 449.85  | 1608.86          | 396.81  | 1608.51          |
| * | 196.15  | <b>1534.23</b>   | 149.73  | 1560.05          | 252.78  | 1560.74          | 146.31  | 1561.63          | 253.48  | 1560.96          | 236.63  | 1561.51          |
| * | 305.02  | <b>1422.73</b>   | 325.35  | 1520.78          | 517.26  | 1519.91          | 258.61  | 1521.09          | 484.37  | 1520.42          | 425.92  | 1520.55          |
| * | 512.82  | <b>1339.61</b>   | 258.24  | 1449.81          | 381.03  | 1449.59          | 241.47  | 1448.77          | 413.85  | 1449.18          | 379.02  | 1448.62          |
| * | 230.58  | <b>1257.69</b>   | 399.06  | 1381.1           | 155.3   | 1406.95          | 98.5    | 1407.28          | 164.1   | 1407.06          | 152.49  | 1407.23          |
| * | 92.6    | <b>1260.95</b>   | 298.94  | 1318.18          | 586.1   | 1380.6           | 270.5   | 1380.99          | 537.12  | 1380.63          | 459.27  | 1380.63          |
| * | 295.67  | <b>1139.22</b>   | 468.65  | 1260.47          | 521.41  | 1317.61          | 295.52  | 1317.86          | 542.73  | 1317.82          | 484.2   | 1317.77          |
| * | 152.28  | <b>1114.96</b>   | 344.53  | 1197.87          | 824.2   | 1260.05          | 451.35  | 1260.47          | 858.17  | 1260.06          | 757.93  | 1260             |
| * | 549.7   | <b>1069.49</b>   | 269.29  | 1167.79          | 553.63  | 1198.02          | 313.54  | 1197.37          | 578.52  | 1197.69          | 527.59  | 1197.61          |
| * | 1042.27 | <b>1031.23</b>   | 221.59  | 1130.73          | 496.29  | 1167.41          | 265.27  | 1167.34          | 501.85  | 1167.38          | 449.63  | 1167.41          |
| * |         |                  | 361.97  | 1091.58          | 261.82  | 1131.61          | 179.14  | 1130.97          | 287.58  | 1131.36          | 305.41  | 1131.12          |
| * |         |                  | 323.68  | 1013.68          | 506.03  | 1092.05          | 241.85  | 1091.78          | 457.65  | 1092.11          | 444.24  | 1091.96          |
|   |         |                  |         |                  |         | 1013.67          |         | 1013.81          |         | 1013.7           |         | 1013.68          |

PP: Prominent Peak

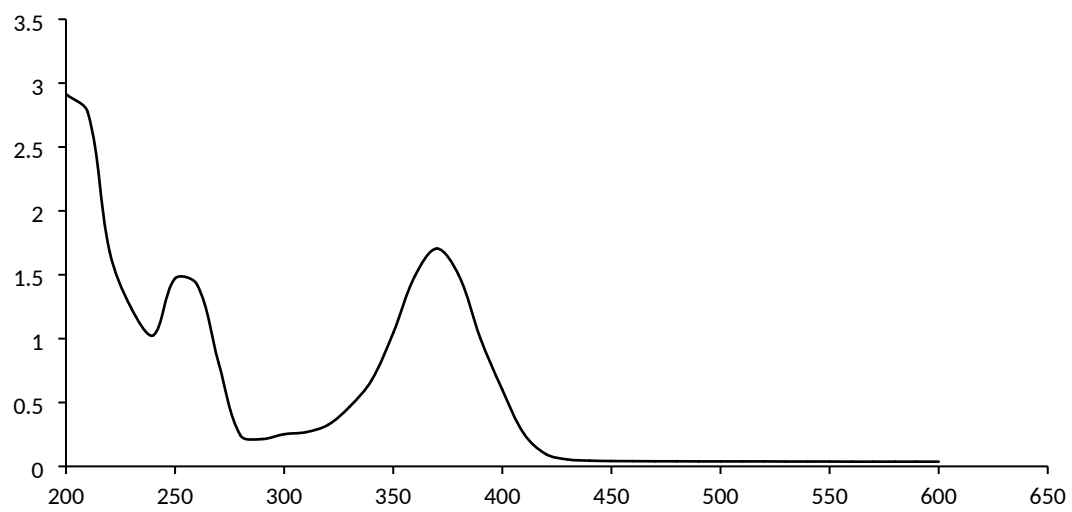

**Fig S1**

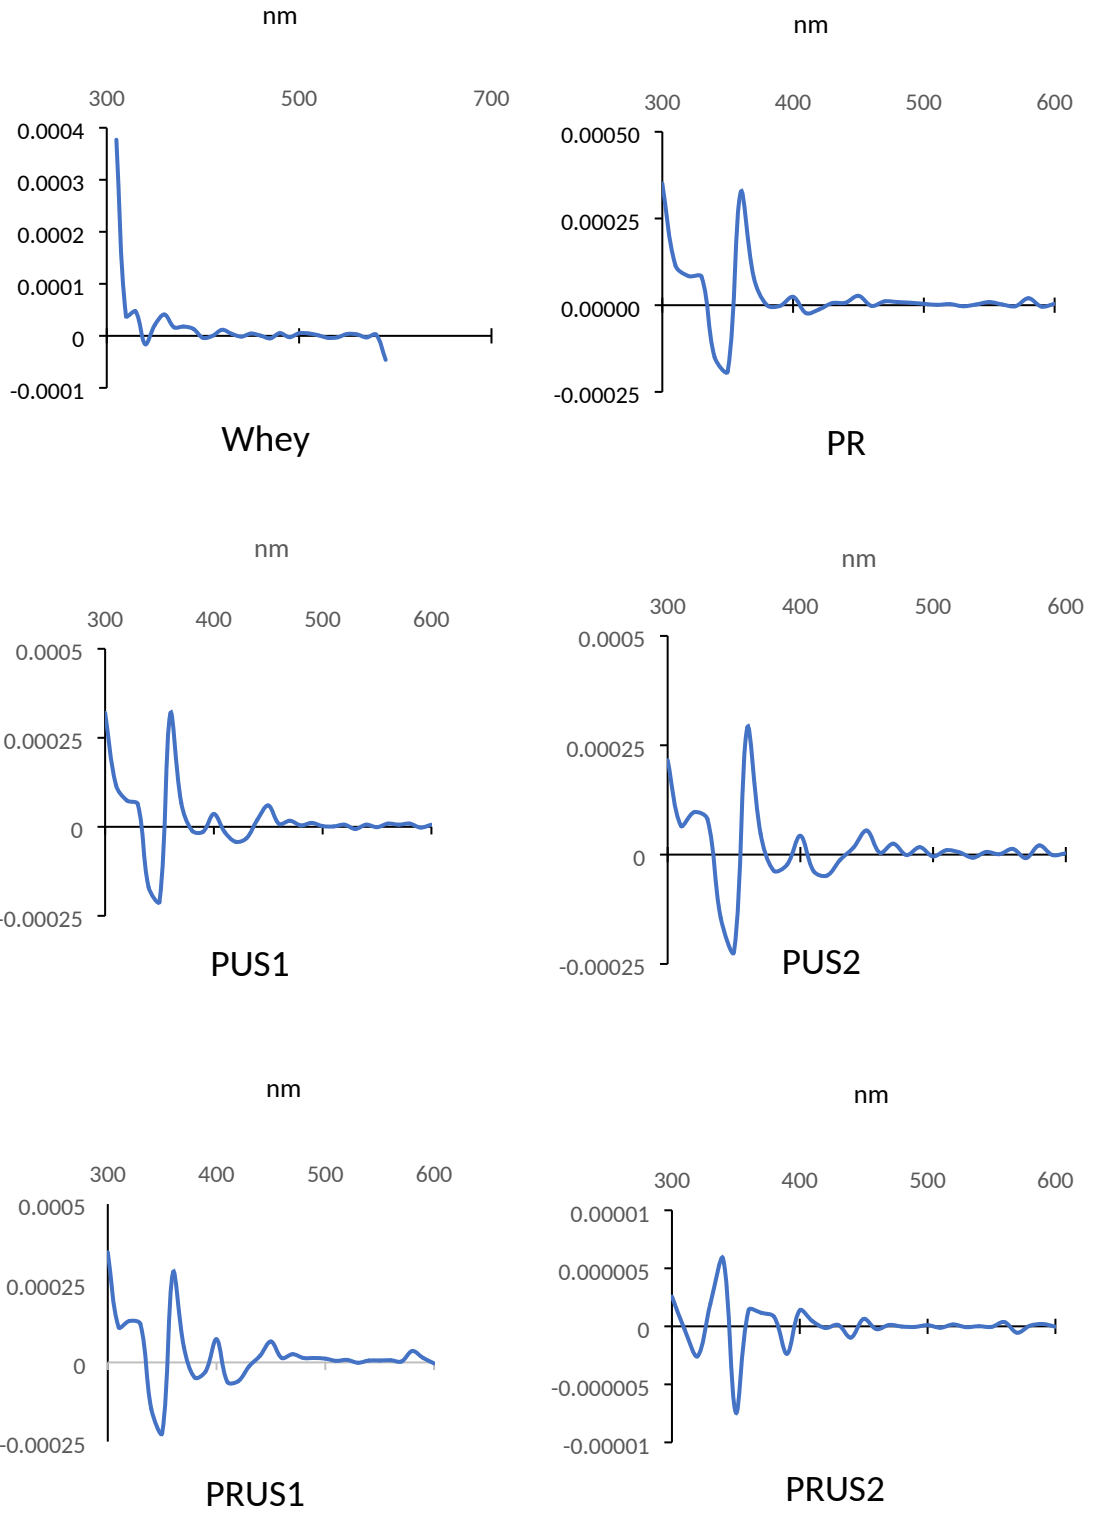

**Figure S2.**

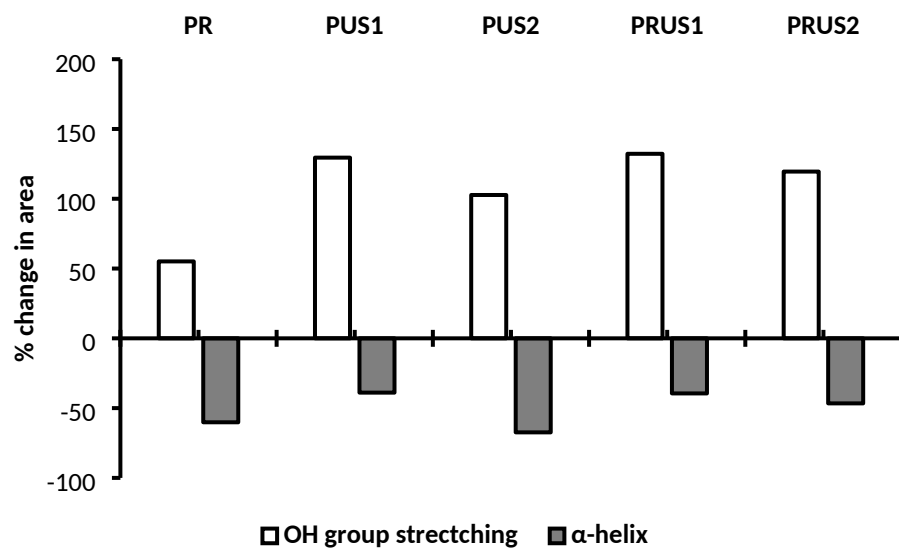

Fig S3



Number Distribution Table-control-w

| d (nm)               | f(%) | f(cum.%) | d (nm)             | f(%) | f(cum.%) | d (nm)               | f(%) | f(cum.%) | d (nm)  | f(%) | f(cum.%) |
|----------------------|------|----------|--------------------|------|----------|----------------------|------|----------|---------|------|----------|
| 113.0                | 0.0  | 0.0      | 686.1              | 5.1  | 86.2     | 4166.4               | 0.0  | 100.0    | 25300.0 | 0.0  | 100.0    |
| D (10%) : 402.5 (nm) |      |          | D (50%) : 494 (nm) |      |          | D (90%) : 736.2 (nm) |      |          |         |      |          |



Number Distribution Table-PR

| d (nm)               | f(%) | f(cum.%) | d (nm)               | f(%) | f(cum.%) | d (nm)               | f(%) | f(cum.%) | d (nm)  | f(%) | f(cum.%) |
|----------------------|------|----------|----------------------|------|----------|----------------------|------|----------|---------|------|----------|
| 66.8                 | 0.0  | 0.0      | 483.5                | 0.1  | 99.7     | 3497.4               | 0.0  | 100.0    | 25300.0 | 0.0  | 100.0    |
| D (10%) : 139.1 (nm) |      |          | D (50%) : 168.6 (nm) |      |          | D (90%) : 236.4 (nm) |      |          |         |      |          |





Number Distribution Table-PRUS1

| d (nm)              | f(%) | f(cum.%) | d (nm)              | f(%) | f(cum.%) | d (nm)              | f(%) | f(cum.%) | d (nm)  | f(%) | f(cum.%) |
|---------------------|------|----------|---------------------|------|----------|---------------------|------|----------|---------|------|----------|
| 64.8                | 0.0  | 96.4     | 454.2               | 0.0  | 99.6     | 3182.5              | 0.0  | 100.0    | 22300.0 | 0.0  | 100.0    |
| D (10%) : 30.5 (nm) |      |          | D (50%) : 33.8 (nm) |      |          | D (90%) : 40.4 (nm) |      |          |         |      |          |



Number Distribution Table-PRUS2

| d (nm)              | f(%) | f(cum.%) | d (nm)              | f(%) | f(cum.%) | d (nm)              | f(%) | f(cum.%) | d (nm)  | f(%) | f(cum.%) |
|---------------------|------|----------|---------------------|------|----------|---------------------|------|----------|---------|------|----------|
| 58.9                | 12.9 | 18.9     | 373.3               | 0.0  | 100.0    | 2366.2              | 0.0  | 100.0    | 15000.0 | 0.0  | 100.0    |
| D (10%) : 55.9 (nm) |      |          | D (50%) : 67.3 (nm) |      |          | D (90%) : 93.8 (nm) |      |          |         |      |          |

User : Common                      Group :                      Repetition : 1/1  
 Date : 1/17/2021                  File Name : waqas sample.PUS1  
 Time : 15:33:28                  Sample Information : FOOD  
 SOP Name : waqas baba-PUS1                      Security : No Security

Version 5.10 / 3.00

Number Distribution PUS1

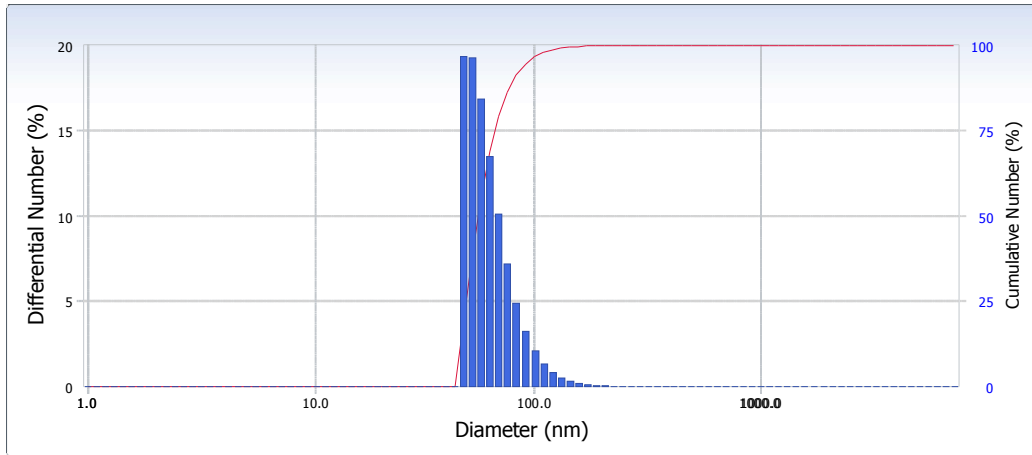

Distribution Results (Contin)

| Peak       | Diameter (nm) | Std. Dev. |
|------------|---------------|-----------|
| 1          | 65.5          | 18.2      |
| 2          | 2,286.8       | 598.7     |
| 3          | 0.0           | 0.0       |
| 4          | 0.0           | 0.0       |
| 5          | 0.0           | 0.0       |
| Average    | 65.5          | 21.4      |
| Residual : | 2.534e-002    | (N.G)     |

Cumulants Results

Diameter (d) : 426.4 (nm)  
 Polydispersity Index (P.I.) : 0.271  
 Diffusion Const. (D) : 1.154e-008 (cm<sup>2</sup>/sec)  
 Measurement Condition  
 Temperature : 25.0 (°C)  
 Diluent Name : WATER  
 Refractive Index : 1.3328  
 Viscosity : 0.8878 (cP)  
 Scattering Intensity : 19114 (cps)  
 Attenuator 1 : 0.9 (%)

Number Distribution Table-PUS1

| d (nm) | f(%) | f(cum.%) |
|--------|------|----------|--------|------|----------|--------|------|----------|--------|------|----------|
| 1.0    | 0.0  | 0.0      | 9.7    | 0.0  | 0.0      | 93.6   | 3.3  | 94.6     | 905.5  | 0.0  | 100.0    |
| 1.1    | 0.0  | 0.0      | 10.6   | 0.0  | 0.0      | 102.5  | 2.1  | 96.7     | 991.5  | 0.0  | 100.0    |
| 1.2    | 0.0  | 0.0      | 11.6   | 0.0  | 0.0      | 112.2  | 1.3  | 98.0     | 1085.8 | 0.0  | 100.0    |
| 1.3    | 0.0  | 0.0      | 12.7   | 0.0  | 0.0      | 122.9  | 0.8  | 98.8     | 1188.9 | 0.0  | 100.0    |
| 1.4    | 0.0  | 0.0      | 13.9   | 0.0  | 0.0      | 134.6  | 0.5  | 99.3     | 1301.9 | 0.0  | 100.0    |
| 1.6    | 0.0  | 0.0      | 15.2   | 0.0  | 0.0      | 147.4  | 0.3  | 99.6     | 1425.6 | 0.0  | 100.0    |
| 1.7    | 0.0  | 0.0      | 16.7   | 0.0  | 0.0      | 161.4  | 0.2  | 99.8     | 1561.1 | 0.0  | 100.0    |
| 1.9    | 0.0  | 0.0      | 18.3   | 0.0  | 0.0      | 176.7  | 0.1  | 99.9     | 1709.5 | 0.0  | 100.0    |
| 2.1    | 0.0  | 0.0      | 20.0   | 0.0  | 0.0      | 193.5  | 0.1  | 99.9     | 1871.9 | 0.0  | 100.0    |
| 2.3    | 0.0  | 0.0      | 21.9   | 0.0  | 0.0      | 211.9  | 0.0  | 100.0    | 2049.8 | 0.0  | 100.0    |
| 2.5    | 0.0  | 0.0      | 24.0   | 0.0  | 0.0      | 232.0  | 0.0  | 100.0    | 2244.6 | 0.0  | 100.0    |
| 2.7    | 0.0  | 0.0      | 26.3   | 0.0  | 0.0      | 254.1  | 0.0  | 100.0    | 2457.9 | 0.0  | 100.0    |
| 3.0    | 0.0  | 0.0      | 28.8   | 0.0  | 0.0      | 278.2  | 0.0  | 100.0    | 2691.5 | 0.0  | 100.0    |
| 3.3    | 0.0  | 0.0      | 31.5   | 0.0  | 0.0      | 304.6  | 0.0  | 100.0    | 2947.2 | 0.0  | 100.0    |
| 3.6    | 0.0  | 0.0      | 34.5   | 0.0  | 0.0      | 333.6  | 0.0  | 100.0    | 3227.3 | 0.0  | 100.0    |
| 3.9    | 0.0  | 0.0      | 37.8   | 0.0  | 0.0      | 365.3  | 0.0  | 100.0    | 3534.0 | 0.0  | 100.0    |
| 4.3    | 0.0  | 0.0      | 41.3   | 0.0  | 0.0      | 400.0  | 0.0  | 100.0    | 3869.8 | 0.0  | 100.0    |
| 4.7    | 0.0  | 0.0      | 45.3   | 0.0  | 0.0      | 438.0  | 0.0  | 100.0    | 4237.5 | 0.0  | 100.0    |
| 5.1    | 0.0  | 0.0      | 49.6   | 19.4 | 19.4     | 479.6  | 0.0  | 100.0    | 4640.2 | 0.0  | 100.0    |
| 5.6    | 0.0  | 0.0      | 54.3   | 19.3 | 38.7     | 525.2  | 0.0  | 100.0    | 5081.2 | 0.0  | 100.0    |
| 6.1    | 0.0  | 0.0      | 59.4   | 16.9 | 55.6     | 575.1  | 0.0  | 100.0    | 5564.0 | 0.0  | 100.0    |
| 6.7    | 0.0  | 0.0      | 65.1   | 13.5 | 69.1     | 629.8  | 0.0  | 100.0    | 6092.8 | 0.0  | 100.0    |
| 7.4    | 0.0  | 0.0      | 71.3   | 10.1 | 79.2     | 689.6  | 0.0  | 100.0    | 6671.7 | 0.0  | 100.0    |
| 8.1    | 0.0  | 0.0      | 78.1   | 7.2  | 86.4     | 755.2  | 0.0  | 100.0    | 7305.8 | 0.0  | 100.0    |

Number Distribution Table-PUS1

| d (nm)              | f(%) | f(cum.%) | d (nm)              | f(%) | f(cum.%) | d (nm)              | f(%) | f(cum.%) | d (nm) | f(%) | f(cum.%) |
|---------------------|------|----------|---------------------|------|----------|---------------------|------|----------|--------|------|----------|
| 8.8                 | 0.0  | 0.0      | 85.5                | 4.9  | 91.3     | 826.9               | 0.0  | 100.0    | 8000.0 | 0.0  | 100.0    |
| D (10%) : 47.4 (nm) |      |          | D (50%) : 57.7 (nm) |      |          | D (90%) : 83.4 (nm) |      |          |        |      |          |



Number Distribution Table-PUS2

| d (nm)              | f(%) | f(cum.%) | d (nm)               | f(%) | f(cum.%) | d (nm)               | f(%) | f(cum.%) | d (nm)  | f(%) | f(cum.%) |
|---------------------|------|----------|----------------------|------|----------|----------------------|------|----------|---------|------|----------|
| 59.3                | 0.0  | 0.0      | 379.4                | 0.1  | 99.8     | 2424.9               | 0.0  | 100.0    | 15500.0 | 0.0  | 100.0    |
| D (10%) : 88.4 (nm) |      |          | D (50%) : 106.5 (nm) |      |          | D (90%) : 154.3 (nm) |      |          |         |      |          |
